# Supplementary material for: Reduction in the Residues of Penthiopyrad in Processed Edible Vegetables by Various Soaking Treatments and Health Hazard Evaluation in China
Source: MDPI journal article supplement (doi:10.3390/foods12040892), 2023-02-19
Supplement: s1 [file s1]

## Supplementary Materials

**Table S1.** Brief introduction of different soaking procedures.

| Processing method                 | Processing parameters                        | Duration (min) |
|-----------------------------------|----------------------------------------------|----------------|
| Water soaking                     | Water at room temperature                    | 5, 10, 15, 20  |
| Heated water soaking              | Heated water maintained at 45 °C             | 5, 10, 15, 20  |
| Ultrasound-assisted water soaking | Water at room temperature                    | 4, 6, 8, 10    |
|                                   | Ultrasound frequency: 40 kHz                 |                |
| Water soaking with additives      | Additive: NaCl, acetic acid, LAS and ethanol | 15             |
|                                   | Additive concentration: 0.2%, 0.5%, 1%       |                |

**Table S2.** Concentrations of penthiopyrad enantiomers in soaking solution, raw and processed tomato samples in water for different durations.

| Treatment | Duration (min) | Concentration (Average $\pm$ SD, $n = 3$ , $\mu\text{g/kg}$ ) |            |             |              |              |              |                |                |                |              |              |                |
|-----------|----------------|---------------------------------------------------------------|------------|-------------|--------------|--------------|--------------|----------------|----------------|----------------|--------------|--------------|----------------|
|           |                | Solution                                                      |            |             | Pulp         |              |              | Peel           |                |                | Whole fruit  |              |                |
|           |                | <i>R</i>                                                      | <i>S</i>   | <i>Rac</i>  | <i>R</i>     | <i>S</i>     | <i>Rac</i>   | <i>R</i>       | <i>S</i>       | <i>Rac</i>     | <i>R</i>     | <i>S</i>     | <i>Rac</i>     |
| Control   | 0              | /                                                             | /          | /           | 162 $\pm$ 11 | 161 $\pm$ 10 | 323 $\pm$ 21 | 2261 $\pm$ 132 | 2293 $\pm$ 161 | 4555 $\pm$ 294 | 753 $\pm$ 29 | 760 $\pm$ 27 | 1514 $\pm$ 56  |
| A         | 5              | 10 $\pm$ 1                                                    | 10 $\pm$ 1 | 20 $\pm$ 1  | 21 $\pm$ 1   | 22 $\pm$ 0   | 44 $\pm$ 1   | 2064 $\pm$ 45  | 2088 $\pm$ 65  | 4152 $\pm$ 109 | 681 $\pm$ 10 | 692 $\pm$ 7  | 1373 $\pm$ 16  |
|           | 10             | 11 $\pm$ 0                                                    | 11 $\pm$ 0 | 22 $\pm$ 0  | 13 $\pm$ 1   | 13 $\pm$ 1   | 26 $\pm$ 2   | 1962 $\pm$ 38  | 1994 $\pm$ 37  | 3956 $\pm$ 70  | 618 $\pm$ 40 | 634 $\pm$ 42 | 1252 $\pm$ 82  |
|           | 15             | 11 $\pm$ 0                                                    | 11 $\pm$ 0 | 22 $\pm$ 0  | 11 $\pm$ 1   | 10 $\pm$ 1   | 21 $\pm$ 2   | 1661 $\pm$ 32  | 1708 $\pm$ 62  | 3370 $\pm$ 92  | 553 $\pm$ 15 | 574 $\pm$ 17 | 1126 $\pm$ 31  |
|           | 20             | 12 $\pm$ 0                                                    | 13 $\pm$ 1 | 25 $\pm$ 2  | 4 $\pm$ 0    | 4 $\pm$ 0    | 8 $\pm$ 0    | 1484 $\pm$ 194 | 1491 $\pm$ 183 | 2975 $\pm$ 377 | 512 $\pm$ 48 | 511 $\pm$ 33 | 1023 $\pm$ 77  |
|           | 5              | 22 $\pm$ 1                                                    | 23 $\pm$ 1 | 45 $\pm$ 2  | 69 $\pm$ 4   | 63 $\pm$ 3   | 132 $\pm$ 6  | 1545 $\pm$ 90  | 1528 $\pm$ 60  | 3073 $\pm$ 150 | 585 $\pm$ 63 | 580 $\pm$ 70 | 1165 $\pm$ 132 |
| B         | 10             | 46 $\pm$ 2                                                    | 47 $\pm$ 1 | 94 $\pm$ 3  | 60 $\pm$ 3   | 60 $\pm$ 1   | 120 $\pm$ 4  | 1298 $\pm$ 46  | 1310 $\pm$ 84  | 2608 $\pm$ 129 | 455 $\pm$ 88 | 440 $\pm$ 92 | 895 $\pm$ 180  |
|           | 15             | 59 $\pm$ 3                                                    | 59 $\pm$ 4 | 118 $\pm$ 6 | 52 $\pm$ 2   | 48 $\pm$ 3   | 100 $\pm$ 4  | 1194 $\pm$ 21  | 1206 $\pm$ 31  | 2400 $\pm$ 52  | 328 $\pm$ 17 | 320 $\pm$ 13 | 648 $\pm$ 30   |
|           | 20             | 62 $\pm$ 1                                                    | 63 $\pm$ 1 | 125 $\pm$ 2 | 38 $\pm$ 6   | 37 $\pm$ 4   | 75 $\pm$ 10  | 904 $\pm$ 210  | 903 $\pm$ 229  | 1807 $\pm$ 439 | 283 $\pm$ 28 | 279 $\pm$ 24 | 562 $\pm$ 52   |
|           | 4              | 8 $\pm$ 0                                                     | 8 $\pm$ 0  | 17 $\pm$ 1  | 118 $\pm$ 6  | 118 $\pm$ 6  | 236 $\pm$ 12 | 1606 $\pm$ 32  | 1635 $\pm$ 24  | 3241 $\pm$ 54  | 593 $\pm$ 65 | 591 $\pm$ 66 | 1184 $\pm$ 130 |
| C         | 6              | 10 $\pm$ 1                                                    | 10 $\pm$ 0 | 20 $\pm$ 1  | 95 $\pm$ 11  | 97 $\pm$ 10  | 192 $\pm$ 18 | 1250 $\pm$ 18  | 1259 $\pm$ 18  | 2509 $\pm$ 36  | 513 $\pm$ 21 | 514 $\pm$ 23 | 1027 $\pm$ 45  |
|           | 8              | 73 $\pm$ 0                                                    | 73 $\pm$ 1 | 146 $\pm$ 1 | 80 $\pm$ 5   | 48 $\pm$ 2   | 158 $\pm$ 6  | 1136 $\pm$ 84  | 1159 $\pm$ 93  | 2295 $\pm$ 177 | 430 $\pm$ 45 | 426 $\pm$ 52 | 856 $\pm$ 97   |
|           | 10             | 88 $\pm$ 3                                                    | 88 $\pm$ 3 | 176 $\pm$ 6 | 9 $\pm$ 2    | 9 $\pm$ 1    | 18 $\pm$ 3   | 881 $\pm$ 87   | 900 $\pm$ 81   | 1781 $\pm$ 167 | 202 $\pm$ 40 | 200 $\pm$ 39 | 402 $\pm$ 80   |

SD was standard deviation. A: Water soaking and peeling; B: Heated water soaking and peeling; C: Ultrasound-assisted soaking and peeling.

**Table S3.** Concentrations of penthiopyrad enantiomers in soaking solution, raw and processed tomato samples at solutions with different additives for 15 min.

| Treatment | Content (%) | Concentration (Average $\pm$ SD, $n = 3$ , $\mu\text{g/kg}$ ) |             |              |              |              |              |                |                |                |              |              |               |
|-----------|-------------|---------------------------------------------------------------|-------------|--------------|--------------|--------------|--------------|----------------|----------------|----------------|--------------|--------------|---------------|
|           |             | Solution                                                      |             |              | Pulp         |              |              | Peel           |                |                | Whole fruit  |              |               |
|           |             | <i>R</i>                                                      | <i>S</i>    | <i>Rac</i>   | <i>R</i>     | <i>S</i>     | <i>Rac</i>   | <i>R</i>       | <i>S</i>       | <i>Rac</i>     | <i>R</i>     | <i>S</i>     | <i>Rac</i>    |
| Control   | 0           | /                                                             | /           | /            | 162 $\pm$ 11 | 161 $\pm$ 10 | 323 $\pm$ 21 | 2261 $\pm$ 132 | 2293 $\pm$ 161 | 4555 $\pm$ 294 | 753 $\pm$ 29 | 760 $\pm$ 27 | 1514 $\pm$ 56 |
| D         | 0.2         | 80 $\pm$ 1                                                    | 76 $\pm$ 2  | 157 $\pm$ 3  | 5 $\pm$ 1    | 5 $\pm$ 2    | 10 $\pm$ 2   | 1225 $\pm$ 145 | 1187 $\pm$ 144 | 2412 $\pm$ 289 | 201 $\pm$ 20 | 190 $\pm$ 18 | 391 $\pm$ 38  |
|           | 0.5         | 83 $\pm$ 2                                                    | 82 $\pm$ 3  | 165 $\pm$ 5  | 4 $\pm$ 0    | 4 $\pm$ 0    | 7 $\pm$ 1    | 976 $\pm$ 37   | 940 $\pm$ 29   | 1916 $\pm$ 65  | 105 $\pm$ 6  | 101 $\pm$ 5  | 206 $\pm$ 11  |
|           | 1.0         | 112 $\pm$ 9                                                   | 108 $\pm$ 7 | 221 $\pm$ 16 | 3 $\pm$ 0    | 3 $\pm$ 0    | 6 $\pm$ 0    | 671 $\pm$ 9    | 639 $\pm$ 11   | 1310 $\pm$ 20  | 83 $\pm$ 2   | 80 $\pm$ 1   | 163 $\pm$ 3   |
| E         | 0.2         | 3 $\pm$ 0                                                     | 3 $\pm$ 0   | 5 $\pm$ 0    | 5 $\pm$ 1    | 5 $\pm$ 1    | 10 $\pm$ 2   | 694 $\pm$ 16   | 679 $\pm$ 8    | 1374 $\pm$ 24  | 116 $\pm$ 8  | 116 $\pm$ 9  | 232 $\pm$ 17  |
|           | 0.5         | 3 $\pm$ 0                                                     | 3 $\pm$ 0   | 6 $\pm$ 0    | 4 $\pm$ 0    | 4 $\pm$ 0    | 8 $\pm$ 1    | 358 $\pm$ 31   | 357 $\pm$ 28   | 714 $\pm$ 59   | 100 $\pm$ 8  | 98 $\pm$ 7   | 198 $\pm$ 15  |
|           | 1.0         | 3 $\pm$ 0                                                     | 3 $\pm$ 0   | 6 $\pm$ 0    | 3 $\pm$ 0    | 3 $\pm$ 0    | 7 $\pm$ 1    | 134 $\pm$ 42   | 126 $\pm$ 33   | 260 $\pm$ 75   | 58 $\pm$ 12  | 58 $\pm$ 11  | 115 $\pm$ 23  |
| F         | 0.2         | 5 $\pm$ 0                                                     | 5 $\pm$ 0   | 9 $\pm$ 0    | 10 $\pm$ 1   | 10 $\pm$ 0   | 19 $\pm$ 1   | 321 $\pm$ 22   | 322 $\pm$ 18   | 643 $\pm$ 40   | 160 $\pm$ 16 | 156 $\pm$ 18 | 316 $\pm$ 34  |
|           | 0.5         | 8 $\pm$ 0                                                     | 8 $\pm$ 0   | 15 $\pm$ 0   | 9 $\pm$ 0    | 9 $\pm$ 0    | 17 $\pm$ 1   | 296 $\pm$ 2    | 289 $\pm$ 12   | 585 $\pm$ 14   | 131 $\pm$ 6  | 125 $\pm$ 6  | 256 $\pm$ 11  |
|           | 1.0         | 12 $\pm$ 0                                                    | 12 $\pm$ 0  | 23 $\pm$ 0   | 8 $\pm$ 0    | 8 $\pm$ 0    | 16 $\pm$ 0   | 267 $\pm$ 39   | 254 $\pm$ 42   | 520 $\pm$ 81   | 116 $\pm$ 2  | 114 $\pm$ 3  | 230 $\pm$ 5   |
| G         | 0.2         | 11 $\pm$ 0                                                    | 10 $\pm$ 1  | 22 $\pm$ 1   | 122 $\pm$ 11 | 102 $\pm$ 9  | 224 $\pm$ 20 | 1925 $\pm$ 117 | 1860 $\pm$ 86  | 3784 $\pm$ 202 | 384 $\pm$ 51 | 353 $\pm$ 42 | 737 $\pm$ 93  |
|           | 0.5         | 16 $\pm$ 0                                                    | 16 $\pm$ 0  | 32 $\pm$ 1   | 95 $\pm$ 14  | 68 $\pm$ 16  | 163 $\pm$ 30 | 1648 $\pm$ 84  | 1575 $\pm$ 102 | 3222 $\pm$ 185 | 308 $\pm$ 8  | 282 $\pm$ 17 | 590 $\pm$ 24  |
|           | 1.0         | 30 $\pm$ 1                                                    | 29 $\pm$ 0  | 59 $\pm$ 1   | 27 $\pm$ 1   | 16 $\pm$ 2   | 43 $\pm$ 3   | 1357 $\pm$ 103 | 1294 $\pm$ 89  | 2651 $\pm$ 192 | 276 $\pm$ 13 | 248 $\pm$ 12 | 525 $\pm$ 25  |

SD was standard deviation, AA was acetic acid, LAS was linear alkylbenzene sulfonates, and EA was ethanol. D: Water soaking with NaCl and peeling; E: Water soaking with AA and peeling; F: Water soaking with LAS and peeling; G: Water soaking with EA and peeling.

**Table S4.** Concentrations of penthiopyrad enantiomers in soaking solution, raw and processed cucumber samples in water for different durations.

| Treatment | Duration (min) | Concentration (Average $\pm$ SD, $n = 3$ , $\mu\text{g/kg}$ ) |              |              |              |              |               |                |                |                 |               |               |                |
|-----------|----------------|---------------------------------------------------------------|--------------|--------------|--------------|--------------|---------------|----------------|----------------|-----------------|---------------|---------------|----------------|
|           |                | Solution                                                      |              |              | Pulp         |              |               | Peel           |                |                 | Whole fruit   |               |                |
|           |                | <i>R</i>                                                      | <i>S</i>     | <i>Rac</i>   | <i>R</i>     | <i>S</i>     | <i>Rac</i>    | <i>R</i>       | <i>S</i>       | <i>Rac</i>      | <i>R</i>      | <i>S</i>      | <i>Rac</i>     |
| Control   | 0              | /                                                             | /            | /            | 305 $\pm$ 15 | 304 $\pm$ 12 | 608 $\pm$ 26  | 5913 $\pm$ 250 | 5875 $\pm$ 189 | 11788 $\pm$ 434 | 2012 $\pm$ 52 | 2008 $\pm$ 54 | 4021 $\pm$ 106 |
| A         | 5              | 7 $\pm$ 1                                                     | 7 $\pm$ 1    | 15 $\pm$ 2   | 18 $\pm$ 1   | 18 $\pm$ 0   | 36 $\pm$ 1    | 5284 $\pm$ 372 | 5256 $\pm$ 397 | 10540 $\pm$ 769 | 1754 $\pm$ 91 | 1812 $\pm$ 82 | 3566 $\pm$ 172 |
|           | 10             | 15 $\pm$ 7                                                    | 15 $\pm$ 7   | 29 $\pm$ 14  | 15 $\pm$ 1   | 15 $\pm$ 1   | 29 $\pm$ 3    | 4036 $\pm$ 511 | 4025 $\pm$ 428 | 8061 $\pm$ 936  | 1595 $\pm$ 28 | 1578 $\pm$ 46 | 3173 $\pm$ 71  |
|           | 15             | 186 $\pm$ 8                                                   | 182 $\pm$ 6  | 368 $\pm$ 14 | 12 $\pm$ 0   | 12 $\pm$ 0   | 25 $\pm$ 0    | 2396 $\pm$ 260 | 2342 $\pm$ 260 | 4738 $\pm$ 520  | 783 $\pm$ 74  | 804 $\pm$ 80  | 1587 $\pm$ 154 |
|           | 20             | 234 $\pm$ 33                                                  | 231 $\pm$ 33 | 465 $\pm$ 65 | 12 $\pm$ 0   | 12 $\pm$ 0   | 23 $\pm$ 1    | 671 $\pm$ 44   | 626 $\pm$ 44   | 1297 $\pm$ 88   | 409 $\pm$ 33  | 414 $\pm$ 48  | 823 $\pm$ 81   |
| B         | 5              | 86 $\pm$ 3                                                    | 85 $\pm$ 4   | 171 $\pm$ 7  | 53 $\pm$ 3   | 53 $\pm$ 3   | 106 $\pm$ 6   | 1821 $\pm$ 70  | 1800 $\pm$ 81  | 3622 $\pm$ 150  | 118 $\pm$ 24  | 122 $\pm$ 23  | 241 $\pm$ 47   |
|           | 10             | 96 $\pm$ 8                                                    | 94 $\pm$ 7   | 190 $\pm$ 14 | 33 $\pm$ 2   | 33 $\pm$ 2   | 66 $\pm$ 4    | 1676 $\pm$ 14  | 1642 $\pm$ 38  | 3318 $\pm$ 50   | 81 $\pm$ 3    | 82 $\pm$ 3    | 162 $\pm$ 6    |
|           | 15             | 117 $\pm$ 9                                                   | 117 $\pm$ 7  | 234 $\pm$ 16 | 27 $\pm$ 4   | 26 $\pm$ 2   | 53 $\pm$ 6    | 1294 $\pm$ 237 | 1328 $\pm$ 305 | 2622 $\pm$ 540  | 66 $\pm$ 9    | 67 $\pm$ 10   | 133 $\pm$ 19   |
|           | 20             | 161 $\pm$ 30                                                  | 159 $\pm$ 31 | 319 $\pm$ 61 | 9 $\pm$ 1    | 9 $\pm$ 1    | 18 $\pm$ 2    | 781 $\pm$ 59   | 866 $\pm$ 74   | 1738 $\pm$ 133  | 43 $\pm$ 3    | 44 $\pm$ 4    | 87 $\pm$ 7     |
| C         | 4              | 62 $\pm$ 4                                                    | 61 $\pm$ 2   | 123 $\pm$ 6  | 139 $\pm$ 78 | 125 $\pm$ 61 | 264 $\pm$ 138 | 4793 $\pm$ 406 | 4721 $\pm$ 391 | 9514 $\pm$ 779  | 1680 $\pm$ 87 | 1683 $\pm$ 74 | 3363 $\pm$ 161 |
|           | 6              | 90 $\pm$ 13                                                   | 88 $\pm$ 11  | 178 $\pm$ 24 | 108 $\pm$ 14 | 107 $\pm$ 14 | 214 $\pm$ 27  | 3568 $\pm$ 122 | 3647 $\pm$ 200 | 7214 $\pm$ 322  | 1422 $\pm$ 94 | 1433 $\pm$ 76 | 2856 $\pm$ 155 |
|           | 8              | 102 $\pm$ 2                                                   | 102 $\pm$ 3  | 205 $\pm$ 5  | 38 $\pm$ 25  | 34 $\pm$ 18  | 73 $\pm$ 43   | 2796 $\pm$ 116 | 2751 $\pm$ 110 | 5548 $\pm$ 226  | 939 $\pm$ 64  | 941 $\pm$ 76  | 1880 $\pm$ 140 |
|           | 10             | 122 $\pm$ 7                                                   | 120 $\pm$ 9  | 242 $\pm$ 16 | 18 $\pm$ 2   | 19 $\pm$ 2   | 36 $\pm$ 4    | 1848 $\pm$ 222 | 1871 $\pm$ 231 | 3718 $\pm$ 452  | 798 $\pm$ 21  | 788 $\pm$ 16  | 1586 $\pm$ 37  |

SD was standard deviation. A: Water soaking and peeling; B: Heated water soaking and peeling; C: Ultrasound-assisted soaking and peeling.

**Table S5.** Concentrations of penthiopyrad enantiomers in soaking solution, raw and processed cucumber samples at solutions with different additives for 15 min.

| Treatment | Content (%) | Concentration (Average $\pm$ SD, $n = 3$ , $\mu\text{g/kg}$ ) |              |              |              |              |              |                |                |                 |                |                |                |
|-----------|-------------|---------------------------------------------------------------|--------------|--------------|--------------|--------------|--------------|----------------|----------------|-----------------|----------------|----------------|----------------|
|           |             | Solution                                                      |              |              | Pulp         |              |              | Peel           |                |                 | Whole fruit    |                |                |
|           |             | <i>R</i>                                                      | <i>S</i>     | <i>Rac</i>   | <i>R</i>     | <i>S</i>     | <i>Rac</i>   | <i>R</i>       | <i>S</i>       | <i>Rac</i>      | <i>R</i>       | <i>S</i>       | <i>Rac</i>     |
| Control   | 0           | /                                                             | /            | /            | 305 $\pm$ 15 | 304 $\pm$ 12 | 608 $\pm$ 26 | 5913 $\pm$ 250 | 5875 $\pm$ 189 | 11788 $\pm$ 434 | 2012 $\pm$ 52  | 2008 $\pm$ 54  | 4021 $\pm$ 106 |
| D         | 0.2         | 71 $\pm$ 12                                                   | 71 $\pm$ 12  | 142 $\pm$ 24 | 8 $\pm$ 0    | 8 $\pm$ 0    | 16 $\pm$ 0   | 2468 $\pm$ 198 | 2298 $\pm$ 161 | 4766 $\pm$ 358  | 823 $\pm$ 68   | 784 $\pm$ 72   | 1607 $\pm$ 141 |
|           | 0.5         | 105 $\pm$ 10                                                  | 105 $\pm$ 11 | 210 $\pm$ 20 | 7 $\pm$ 1    | 7 $\pm$ 1    | 15 $\pm$ 1   | 1108 $\pm$ 65  | 1090 $\pm$ 96  | 2198 $\pm$ 160  | 121 $\pm$ 25   | 117 $\pm$ 23   | 238 $\pm$ 48   |
|           | 1.0         | 121 $\pm$ 4                                                   | 120 $\pm$ 4  | 241 $\pm$ 8  | 5 $\pm$ 0    | 5 $\pm$ 0    | 10 $\pm$ 0   | 932 $\pm$ 19   | 889 $\pm$ 34   | 1821 $\pm$ 52   | 65 $\pm$ 18    | 65 $\pm$ 20    | 130 $\pm$ 38   |
| E         | 0.2         | 4 $\pm$ 1                                                     | 4 $\pm$ 1    | 8 $\pm$ 2    | 9 $\pm$ 1    | 9 $\pm$ 1    | 18 $\pm$ 2   | 1780 $\pm$ 38  | 1715 $\pm$ 40  | 3495 $\pm$ 78   | 42 $\pm$ 1     | 42 $\pm$ 0     | 84 $\pm$ 1     |
|           | 0.5         | 6 $\pm$ 1                                                     | 6 $\pm$ 1    | 13 $\pm$ 2   | 6 $\pm$ 0    | 6 $\pm$ 0    | 12 $\pm$ 0   | 1588 $\pm$ 110 | 1541 $\pm$ 102 | 3129 $\pm$ 212  | 38 $\pm$ 3     | 37 $\pm$ 4     | 75 $\pm$ 6     |
|           | 1.0         | 8 $\pm$ 0                                                     | 8 $\pm$ 0    | 16 $\pm$ 1   | 5 $\pm$ 0    | 5 $\pm$ 0    | 10 $\pm$ 1   | 1242 $\pm$ 52  | 1183 $\pm$ 55  | 2426 $\pm$ 106  | 31 $\pm$ 1     | 30 $\pm$ 2     | 60 $\pm$ 3     |
| F         | 0.2         | 9 $\pm$ 0                                                     | 8 $\pm$ 0    | 17 $\pm$ 1   | 16 $\pm$ 1   | 15 $\pm$ 1   | 32 $\pm$ 2   | 1068 $\pm$ 39  | 1036 $\pm$ 26  | 2104 $\pm$ 64   | 58 $\pm$ 8     | 56 $\pm$ 8     | 114 $\pm$ 16   |
|           | 0.5         | 13 $\pm$ 0                                                    | 13 $\pm$ 0   | 26 $\pm$ 1   | 15 $\pm$ 0   | 14 $\pm$ 1   | 29 $\pm$ 1   | 1067 $\pm$ 54  | 957 $\pm$ 43   | 2023 $\pm$ 94   | 47 $\pm$ 6     | 42 $\pm$ 1     | 88 $\pm$ 7     |
|           | 1.0         | 17 $\pm$ 1                                                    | 16 $\pm$ 1   | 33 $\pm$ 1   | 8 $\pm$ 1    | 8 $\pm$ 0    | 16 $\pm$ 1   | 36 $\pm$ 6     | 33 $\pm$ 3     | 70 $\pm$ 9      | 13 $\pm$ 0     | 13 $\pm$ 0     | 26 $\pm$ 0     |
| G         | 0.2         | 11 $\pm$ 0                                                    | 11 $\pm$ 0   | 22 $\pm$ 1   | 93 $\pm$ 2   | 93 $\pm$ 3   | 186 $\pm$ 5  | 4421 $\pm$ 350 | 4327 $\pm$ 312 | 8748 $\pm$ 662  | 1539 $\pm$ 69  | 1542 $\pm$ 89  | 3081 $\pm$ 158 |
|           | 0.5         | 13 $\pm$ 1                                                    | 13 $\pm$ 1   | 26 $\pm$ 2   | 85 $\pm$ 7   | 83 $\pm$ 8   | 168 $\pm$ 15 | 3867 $\pm$ 160 | 3728 $\pm$ 219 | 7596 $\pm$ 374  | 1340 $\pm$ 154 | 1340 $\pm$ 168 | 2679 $\pm$ 321 |
|           | 1.0         | 17 $\pm$ 3                                                    | 17 $\pm$ 3   | 34 $\pm$ 5   | 28 $\pm$ 6   | 27 $\pm$ 6   | 55 $\pm$ 11  | 3479 $\pm$ 221 | 3330 $\pm$ 135 | 6809 $\pm$ 355  | 957 $\pm$ 102  | 928 $\pm$ 116  | 1884 $\pm$ 217 |

SD was standard deviation, AA was acetic acid, LAS was linear alkylbenzene sulfonates, and EA was ethanol. D: Water soaking with NaCl and peeling; E: Water soaking with AA and peeling; F: Water soaking with LAS and peeling; G: Water soaking with EA and peeling.

**Table S6.** Concentrations of penthiopyrad enantiomers in tomato sauce and cucumber juice samples after storage at room temperature (RT) and 4 °C.

| Sample       | Temperature | Time (d) | Concentration (Average $\pm$ SD, $n = 3$ , $\mu\text{g/kg}$ ) |              |              | Sample         | Temperature | Time (d) | Concentration (Average $\pm$ SD, $n = 3$ , $\mu\text{g/kg}$ ) |            |             |
|--------------|-------------|----------|---------------------------------------------------------------|--------------|--------------|----------------|-------------|----------|---------------------------------------------------------------|------------|-------------|
|              |             |          | <i>R</i>                                                      | <i>S</i>     | <i>Rac</i>   |                |             |          | <i>R</i>                                                      | <i>S</i>   | <i>Rac</i>  |
| Tomato sauce | 4 °C        | 0        | 161 $\pm$ 3                                                   | 145 $\pm$ 2  | 306 $\pm$ 5  | Cucumber juice | 4 °C        | 0        | 63 $\pm$ 0                                                    | 64 $\pm$ 1 | 128 $\pm$ 1 |
|              |             | 1        | 150 $\pm$ 5                                                   | 131 $\pm$ 3  | 281 $\pm$ 10 |                |             | 1        | 63 $\pm$ 0                                                    | 63 $\pm$ 0 | 126 $\pm$ 0 |
|              |             | 2        | 129 $\pm$ 14                                                  | 123 $\pm$ 3  | 252 $\pm$ 16 |                |             | 2        | 61 $\pm$ 1                                                    | 61 $\pm$ 1 | 123 $\pm$ 2 |
|              |             | 3        | 110 $\pm$ 1                                                   | 95 $\pm$ 1   | 205 $\pm$ 2  |                |             | 3        | 59 $\pm$ 0                                                    | 60 $\pm$ 0 | 119 $\pm$ 1 |
|              |             | 5        | 108 $\pm$ 0                                                   | 92 $\pm$ 1   | 200 $\pm$ 1  |                |             | 5        | 57 $\pm$ 0                                                    | 59 $\pm$ 1 | 116 $\pm$ 1 |
|              |             | 7        | 107 $\pm$ 0                                                   | 90 $\pm$ 0   | 197 $\pm$ 1  |                |             | 7        | 57 $\pm$ 1                                                    | 58 $\pm$ 0 | 114 $\pm$ 2 |
|              |             | 9        | 105 $\pm$ 0                                                   | 89 $\pm$ 0   | 194 $\pm$ 0  |                |             | 9        | 56 $\pm$ 0                                                    | 57 $\pm$ 1 | 113 $\pm$ 2 |
|              |             | 12       | 102 $\pm$ 1                                                   | 87 $\pm$ 1   | 190 $\pm$ 2  |                |             | 12       | 54 $\pm$ 1                                                    | 56 $\pm$ 0 | 110 $\pm$ 1 |
|              | RT          | 1        | 139 $\pm$ 1                                                   | 111 $\pm$ 13 | 250 $\pm$ 14 |                | RT          | 1        | 62 $\pm$ 0                                                    | 62 $\pm$ 0 | 124 $\pm$ 1 |
|              |             | 2        | 112 $\pm$ 1                                                   | 93 $\pm$ 1   | 205 $\pm$ 2  |                |             | 2        | 61 $\pm$ 0                                                    | 61 $\pm$ 1 | 122 $\pm$ 2 |
|              |             | 3        | 110 $\pm$ 2                                                   | 91 $\pm$ 0   | 201 $\pm$ 2  |                |             | 3        | 58 $\pm$ 1                                                    | 58 $\pm$ 1 | 116 $\pm$ 2 |
|              |             | 5        | 106 $\pm$ 2                                                   | 89 $\pm$ 1   | 195 $\pm$ 3  |                |             | 5        | 53 $\pm$ 0                                                    | 54 $\pm$ 1 | 107 $\pm$ 1 |
|              |             | 7        | 105 $\pm$ 1                                                   | 88 $\pm$ 0   | 193 $\pm$ 1  |                |             | 7        | 52 $\pm$ 0                                                    | 53 $\pm$ 1 | 106 $\pm$ 2 |
|              |             | 9        | 103 $\pm$ 1                                                   | 86 $\pm$ 0   | 190 $\pm$ 1  |                |             | 9        | 51 $\pm$ 0                                                    | 52 $\pm$ 0 | 103 $\pm$ 0 |
|              |             | 12       | 99 $\pm$ 2                                                    | 82 $\pm$ 2   | 181 $\pm$ 4  |                |             | 12       | 50 $\pm$ 1                                                    | 50 $\pm$ 1 | 100 $\pm$ 2 |

SD was standard deviation.

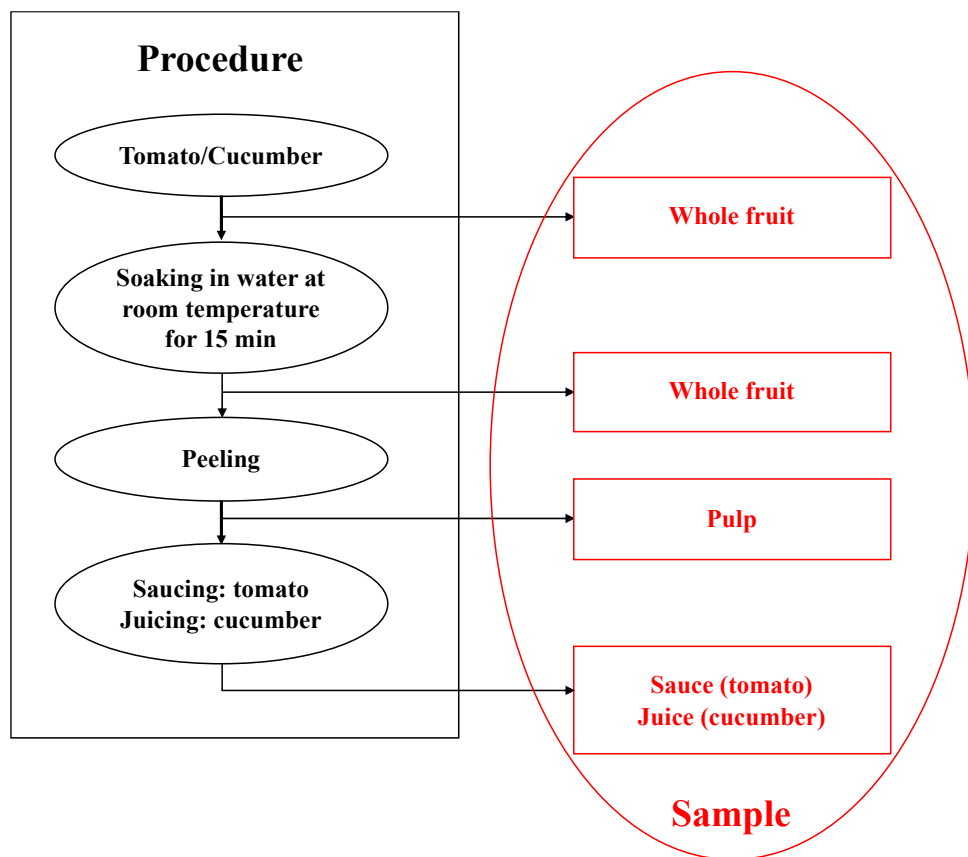

**Figure S1.** Procedure of saucing and juicing.

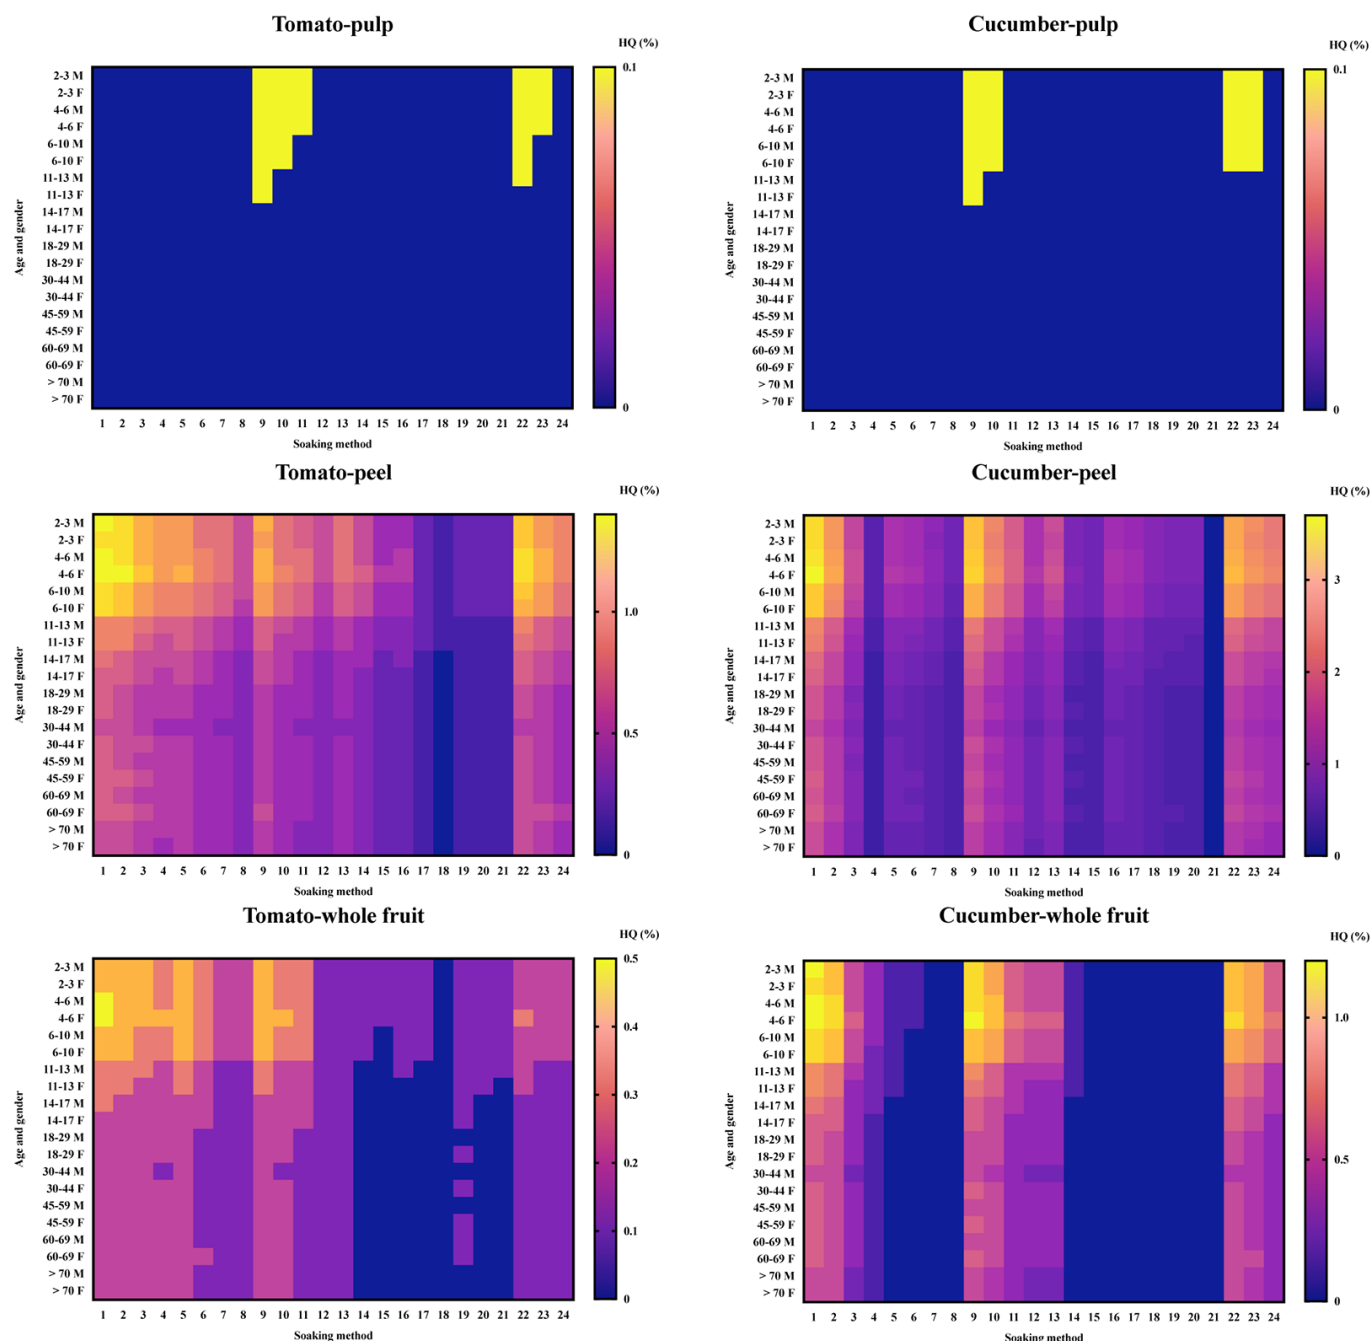

**Figure S2.** Heatmap of health quotient (HQ) values of penthiopyrad (racemate) in tomato and cucumber samples for different ages and genders of Chinese consumers after different soaking methods (1-4: water soaking for 5-20 min and peeling; 5-8: heated water soaking for 5-20 min and peeling; 9-12: ultrasound-assisted soaking for 4-10 min and peeling; 13-15: water soaking with NaCl (0.2%, 0.5%, 1%) and peeling; 16-18: water soaking with AA (0.2%, 0.5%, 1%) and peeling; 19-21: water soaking with LAS (0.2%, 0.5%, 1%) and peeling; 22-24: water soaking with EA (0.2%, 0.5%, 1%) and peeling).
